# Supplementary material
Source: publisher site journal article supplement (https://www.dovepress.com/article/399851)
Supplement: Supplementary file 1 [file get_supplementary_file.php]

Appendix 1. Non-significant comparisons between medical students and faculty in terms of A) perception of CBME, B) understanding of how CBME is currently implemented, and C) perception of benefits and challenges to implementing CBME in UME.

**A)**

| **Internal consistency α=0.75** | N | **Students**  % (n)A | N | **Faculty**  % (n) | *p* |
| --- | --- | --- | --- | --- | --- |
| **Learner Perception:"CBME is an approach that..."** | | | | | | |
| Has clearly defined competence outcomes and expectations | 43 | 65.1 (28) | 46 | 54.3 (25) | 0.730 |
| Has been communicated and explained to me | 43 | 53.5 (23) | 46 | 41.3 (19) | 0.844 |
| Allows students to evaluate their own strengths and weaknesses | 42 | 42.9 (18) | 46 | 43.5 (20) | 0.195 |
| Has terminology that is clearly defined to me | 43 | 37.2 (16) | 46 | 32.6 (15) | 0.840 |
| I am not familiar with | 43 | 34.9 (15) | 46 | 17.4 (8) | 0.197 |
| **Future Impact: "CBME is an approach that..."** | | | | | | |
| Will prepare students for training in residency | 40 | 62.5 (25) | 44 | 50.0 (22) | 0.307 |
| Will allow students to become better mentors in the future | 40 | 57.5 (23) | 44 | 36.4 (16) | 0.327 |

A *All percentages (n) represent the proportion of student and faculty who agree/strongly agree with the statement.*

**B)**

| **Internal consistency α=0.87** | | **Students**  **(N=51)** | **Faculty**  **(N=50)** | *p* |
| --- | --- | --- | --- | --- |
| **% (n)** | |  |
| **In independent online learning, CBME is implemented...** | |  |  |  |
|  | Within the learning objectives | 41.2 (21) | 30.0 (15) | 0.572 |
|  | During delivery of online learning material | 19.6 (10) | 22.0 (11) | 0.987 |
|  | During formative assessments | 27.5 (14) | 42.0 (21) | 0.355 |
|  | CBME is not implemented in independent online learning | 9.8 (5) | 10.0 (5) | 1.000 |
|  | Other | 0.0 (0) | 2.0 (1) | 0.774 |
|  | Not sure | 17.6 (9) | 38.0 (19) | 0.124 |
| **In lecture-based learning, CBME is implemented...** | |  |  |  |
|  | When discussing learning objectives | 37.3 (19) | 30.0 (15) | 0.807 |
|  | During delivery of learning material | 23.5 (12) | 22.0 (11) | 1.000 |
|  | Through class participation | 37.3 (19) | 22.0 (11) | 0.327 |
|  | CBME is not implemented in lecture-based learning | 7.8 (4) | 16.0 (8) | 0.461 |
|  | Other | 0.0 (0) | 6.0 (3) | 0.327 |
| **In small group discussions, CBME is implemented...** | |  |  |  |
|  | When discussing learning objectives | 33.3 (17) | 34.0 (17) | 1.000 |
|  | During case discussions | 51.0 (26) | 42.0 (21) | 0.725 |
|  | Through performing written self-evaluations | 19.6 (10) | 24.0 (12) | 0.869 |
|  | Through receiving written feedback from others (e.g. from students/preceptor) | 35.3 (18) | 40.0 (20) | 0.869 |
|  | Through receiving face-to-face feedback from others (e.g. from students/preceptor) | 41.2 (21) | 40.0 (20) | 1.000 |
|  | CBME is not implemented in small group discussions | 5.9 (3) | 6.0 (3) | 1.000 |
|  | Other | 0.0 (0) | 2.0 (1) | 0.774 |
| **In history-taking and physical exam learning, CBME is implemented...** | | | | |
|  | When discussing learning objectives | 31.4 (16) | 26.0 (13) | 0.661 |
|  | Through completing preparatory material | 29.4 (15) | 24.0 (12) | 0.654 |
|  | When receiving teaching | 35.3 (18) | 30.0 (15) | 0.672 |
|  | When performing tasks | 56.9 (29) | 48.0 (24) | 0.428 |
|  | Through performing written self-evaluations | 27.5 (14) | 30.0 (15) | 0.828 |
|  | Through receiving written feedback from others | 35.3 (18) | 42.0 (21) | 0.543 |
|  | Through receiving face-to-face feedback from others | 56.9 (29) | 46.0 (23) | 0.322 |
|  | During formative assessments | 35.3 (18) | 48.0 (24) | 0.229 |
|  | CBME is not implemented in history-taking and physical exam learning | 0.0 (0) | 0.0 (0) | 1.000 |
|  | Other | 0.0 (0) | 0.0 (0) | 1.000 |

**C)**

| **Internal consistency: perceived benefits (α=0.92), perceived challenges (α=0.65)** | | **Students**  **(N=36)** | **Faculty**  **(N=43)** | *p* |
| --- | --- | --- | --- | --- |
| **% (n)** | |  |
| **Percentage of participants indicating the below statements were a benefit:** | | | | | |
|  | Increased medical student awareness of the competence expectations they are expected to achieve | 72.2 (26) | 86.0 (37) | 0.327 |
|  | Improved ability for students to identify own weaknesses | 66.7 (24) | 69.8 (30) | 0.992 |
|  | Students receiving increased frequency of feedback | 63.9 (23) | 79.1 (34) | 0.355 |
|  | Students receiving more personalized feedback | 63.9 (23) | 65.1 (28) | 0.987 |
|  | Students receiving more structured feedback | 52.8 (19) | 72.1 (31) | 0.257 |
|  | Increased faculty awareness of the competence expectations that medical students are expected to achieve | 77.8 (28) | 62.8 (27) | 0.355 |
|  | Improved faculty accountability for their teaching | 61.1 (22) | 44.2 (19) | 0.327 |
| **Percentage of participants indicating the below statements were a challenge:** | | | | | |
|  | Inadequate communication pertaining to the relevance of CBME in medical school education | 22 (62.9 (22) | 65.1 (28) | 0.987 |
|  | Lack of understanding of the competence expectations that medical students are expected to achieve | 22 (62.9 (22) | 79.1 (34) | 0.403 |
|  | Confusion for students surrounding what to do with feedback that is received | 17 (48.6 (17) | 69.8 (30) | 0.355 |
|  | Lack of understanding of the steps to achieving competency expectations | 26 (74.3 (26) | 76.7 (33) | 1.000 |
|  | Evaluations that feel like a “checklist” | 22 (62.9 (22) | 83.7 (36) | 0.192 |
|  | Difficulty in translating competencies to MS3 and MS4 clerkship curriculum | 14 (40.0 (14) | 65.1 (28) | 0.124 |
